# Supplementary material for: Contact Reactive Brazing of TC4 Alloy to Al7075 Alloy with Deposited Cu Interlayer
Source: MDPI journal article supplement (doi:10.3390/ma14216570), 2021-11-01
Supplement: s1 [file s1]

# Contact Reactive Brazing of TC4 Alloy to Al7075 Alloy with Deposited Cu Interlayer

Mengjuan Yang<sup>1</sup>, Chaonan Niu<sup>2</sup>, Shengpeng Hu<sup>2</sup>, Xiaoguo Song<sup>2,3,\*</sup>, Yinyin Pei<sup>4</sup>, Jian Zhao<sup>1</sup> and Weimin Long<sup>4</sup>

<sup>1</sup> School of Materials Engineering, Shanghai University of Engineering Science, Shanghai 201620, China; yang13137760150@163.com (M.Y.); zhaojianhit@163.com (J.Z.)

<sup>2</sup> State Key Laboratory of Advanced Welding and Joining, Harbin Institute of Technology, Harbin 150001, China; ncnhitwh@163.com (C.N.); sp\_hu@hit.edu.cn (S.H.)

<sup>3</sup> Shandong Institute of Shipbuilding Technology, Weihai 264209, China

<sup>4</sup> State Key Laboratory of Advanced Brazing Filler Metals and Technology, Zhengzhou Research Institute of Mechanical Engineering Co., LTD, Zhengzhou 450001, China; balloy@163.com (Y.P.); brazelong@163.com (W.L.)

\* Correspondence: xgsong@hitwh.edu.cn; Tel./Fax: +86-631-5678454

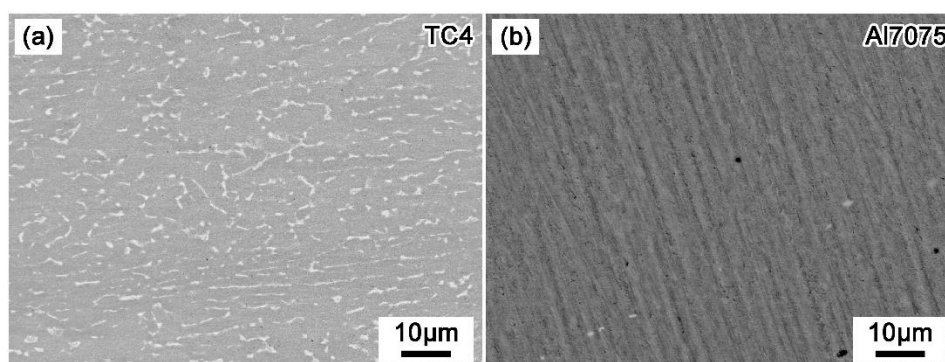

Figure S1. the characterization microstructures of the TC4 and Al7075 substrate: (a) TC4; (b) Al7075.

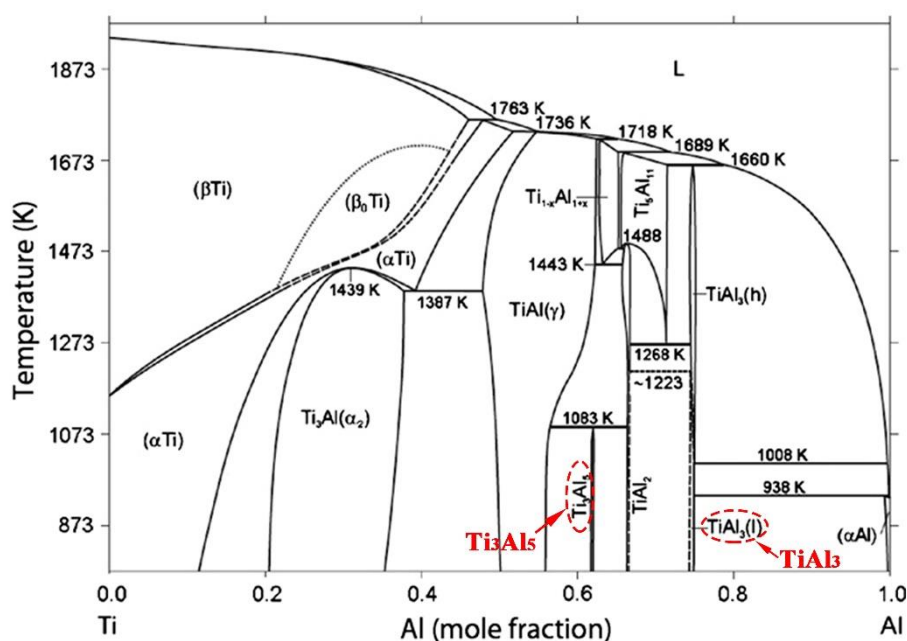

Figure S2. Al-Ti binary phase diagram.

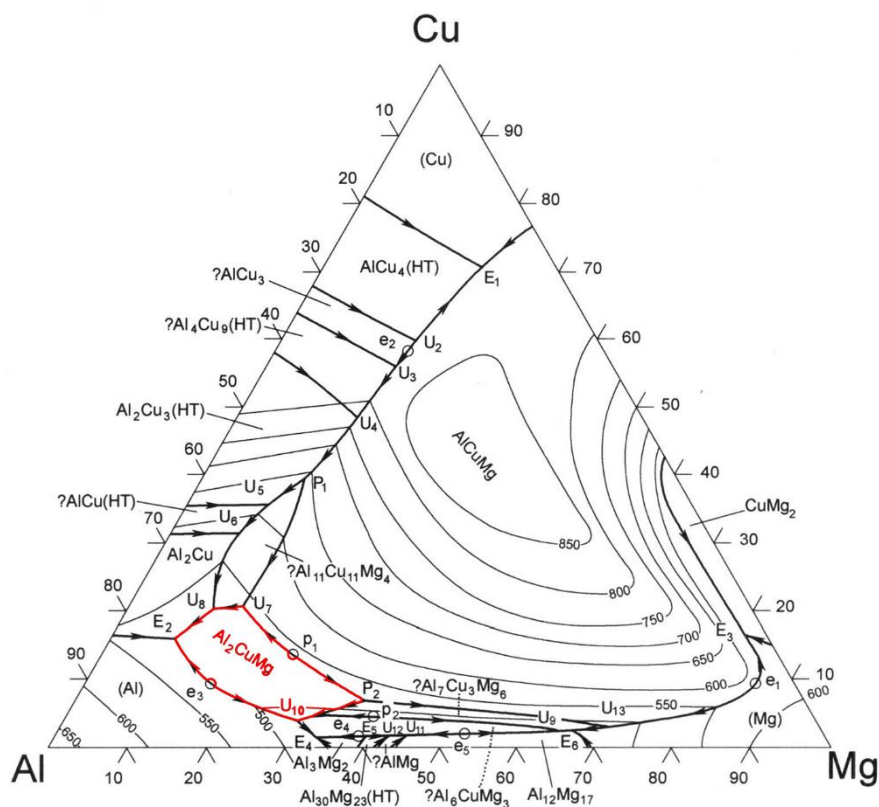

Figure S3. Al-Cu-Mg ternary phase diagram.

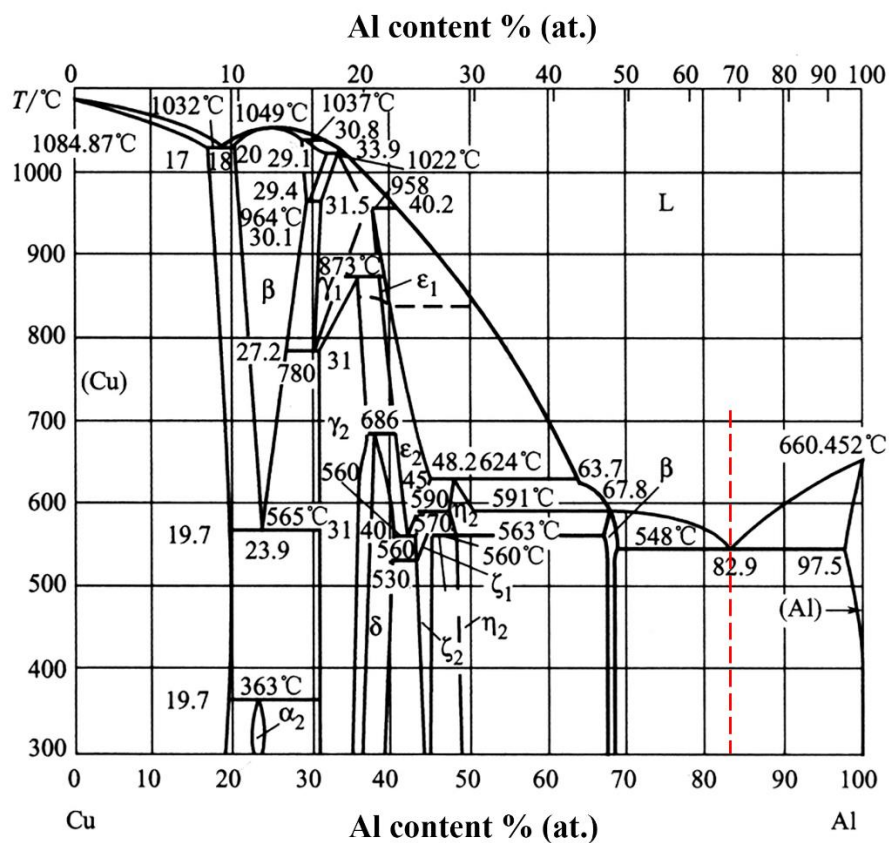

Figure S4. Al-Cu binary phase diagram.
